# Supplementary material
Source: PubMed Central journal article supplement (PMC124359)
Supplement: pnas_122235399_4.pdf [file pnas_122235399_4.pdf]

# Antibody blocking controls

## C-terminal APC

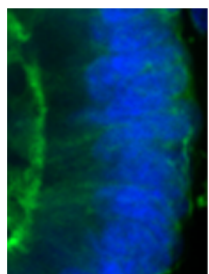

Ab4

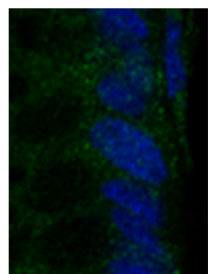

Ab4 +bl. pep.

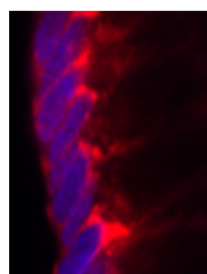

C20

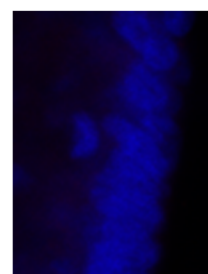

C20+bl. pep.

## N-terminal APC

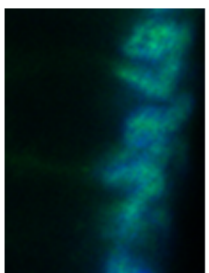

Ab1

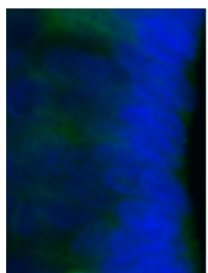

Ab1+bl. pep.

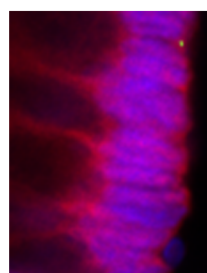

N15

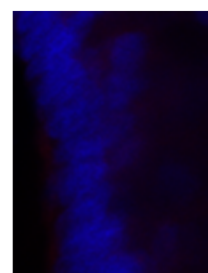

N15+ bl. pep.

## Axin

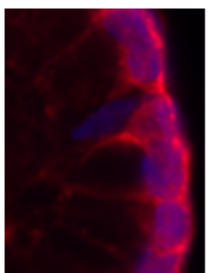

AX1

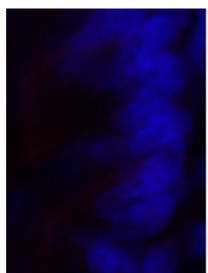

AX1+bl. pep.

## Axin2

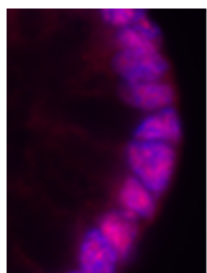

AX2

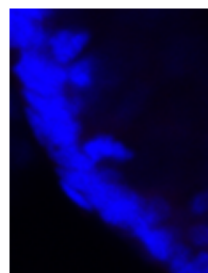

AX2+bl. pep.
